# Supplementary material for: High-energy X-ray focusing and applications to pair distribution function investigation of Pt and Au nanoparticles at high pressures
Source: PubMed Central journal article supplement (PMC4763265; doi:10.1038/srep21434), 2016-02-23
Supplement: srep21434-s1.pdf [file srep21434-s1.pdf]

# Supporting Information

High-energy X-ray focusing and applications to pair distribution function investigation of Pt and Au nanoparticles at high pressures

Xinguo Hong<sup>1,\*</sup>, Lars Ehm<sup>1,2</sup>, Zhong Zhong<sup>2</sup>, Sanjit Ghose<sup>2</sup>, Thomas S. Duffy<sup>3,\*</sup> and Donald J. Weidner<sup>1</sup>

<sup>1</sup>Mineral Physics Institute, Stony Brook University, Stony Brook, NY 11794, USA

<sup>2</sup>National Synchrotron Light Source II, Brookhaven National Laboratory, Upton, NY 11973, USA

<sup>3</sup>Department of Geosciences, Princeton University, Princeton, NJ 08544, USA

## Supplementary Figures

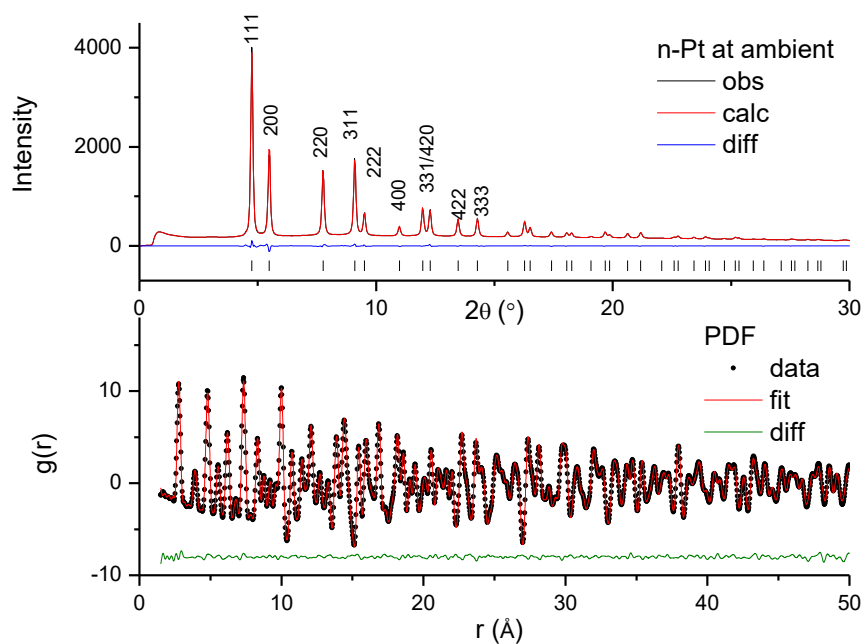

**Figure S1.**

(Upper panel) Rietveld refinements of the diffraction patterns of n-Pt (50nm) at ambient pressure using a simple FCC Pt structure model with a fit residual of  $R_{\text{obs}}$ : 2.32,  $\omega R_{\text{obs}}$ : 3.02; and  $\text{GoF}_{\text{obs}}$ : 0.24. The observed, calculated and difference curves are represented. The tick marks indicate the calculated Bragg reflections. The lattice parameter refinements based on the simple FCC model shows a slight misfit in the intensity ratio of the 111 and 200 reflections.

(Lower panel) the corresponding high-pressure PDF fit using a simple FCC Pt structure model for the same diffraction data with a fit residual,  $R_w$ , of 0.06, in the range of 1.5-50 Å. The experimental  $g(r)$ , calculated and difference curves are represented.

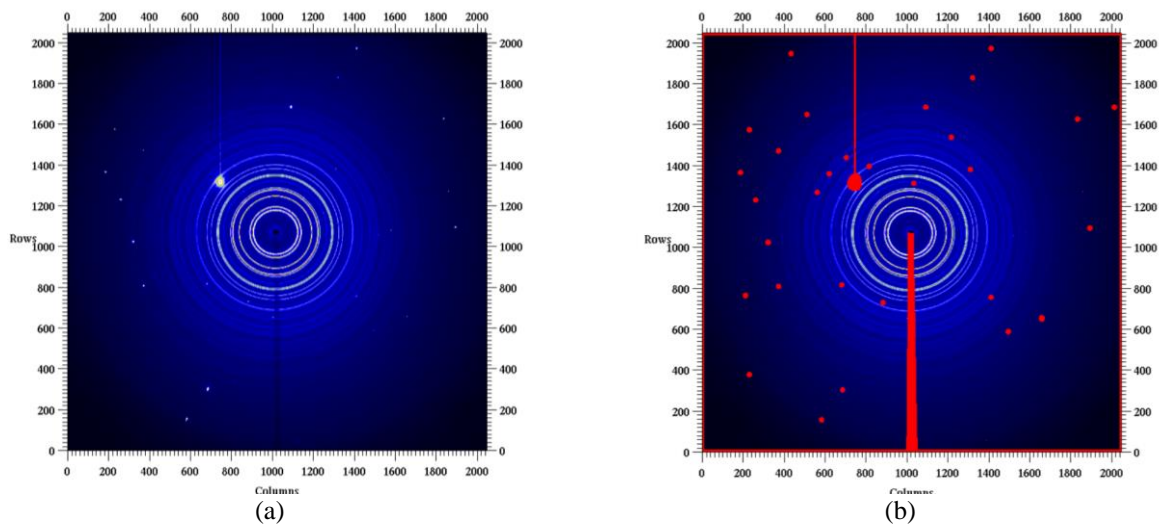

**Figure S2.** X-ray diffraction image of nano Pt (50 nm) loaded in M:E=4:1 medium at 12.5 GPa using a focused X-ray beam (66.054 keV). (a) Raw image; (b) image with masked unwanted peaks for Fit2D integration.
